# Supplementary material
Source: publisher site journal article supplement (https://www.dovepress.com/article/282947)

**Figure S1 The uncropped images of membranes used for the research.**


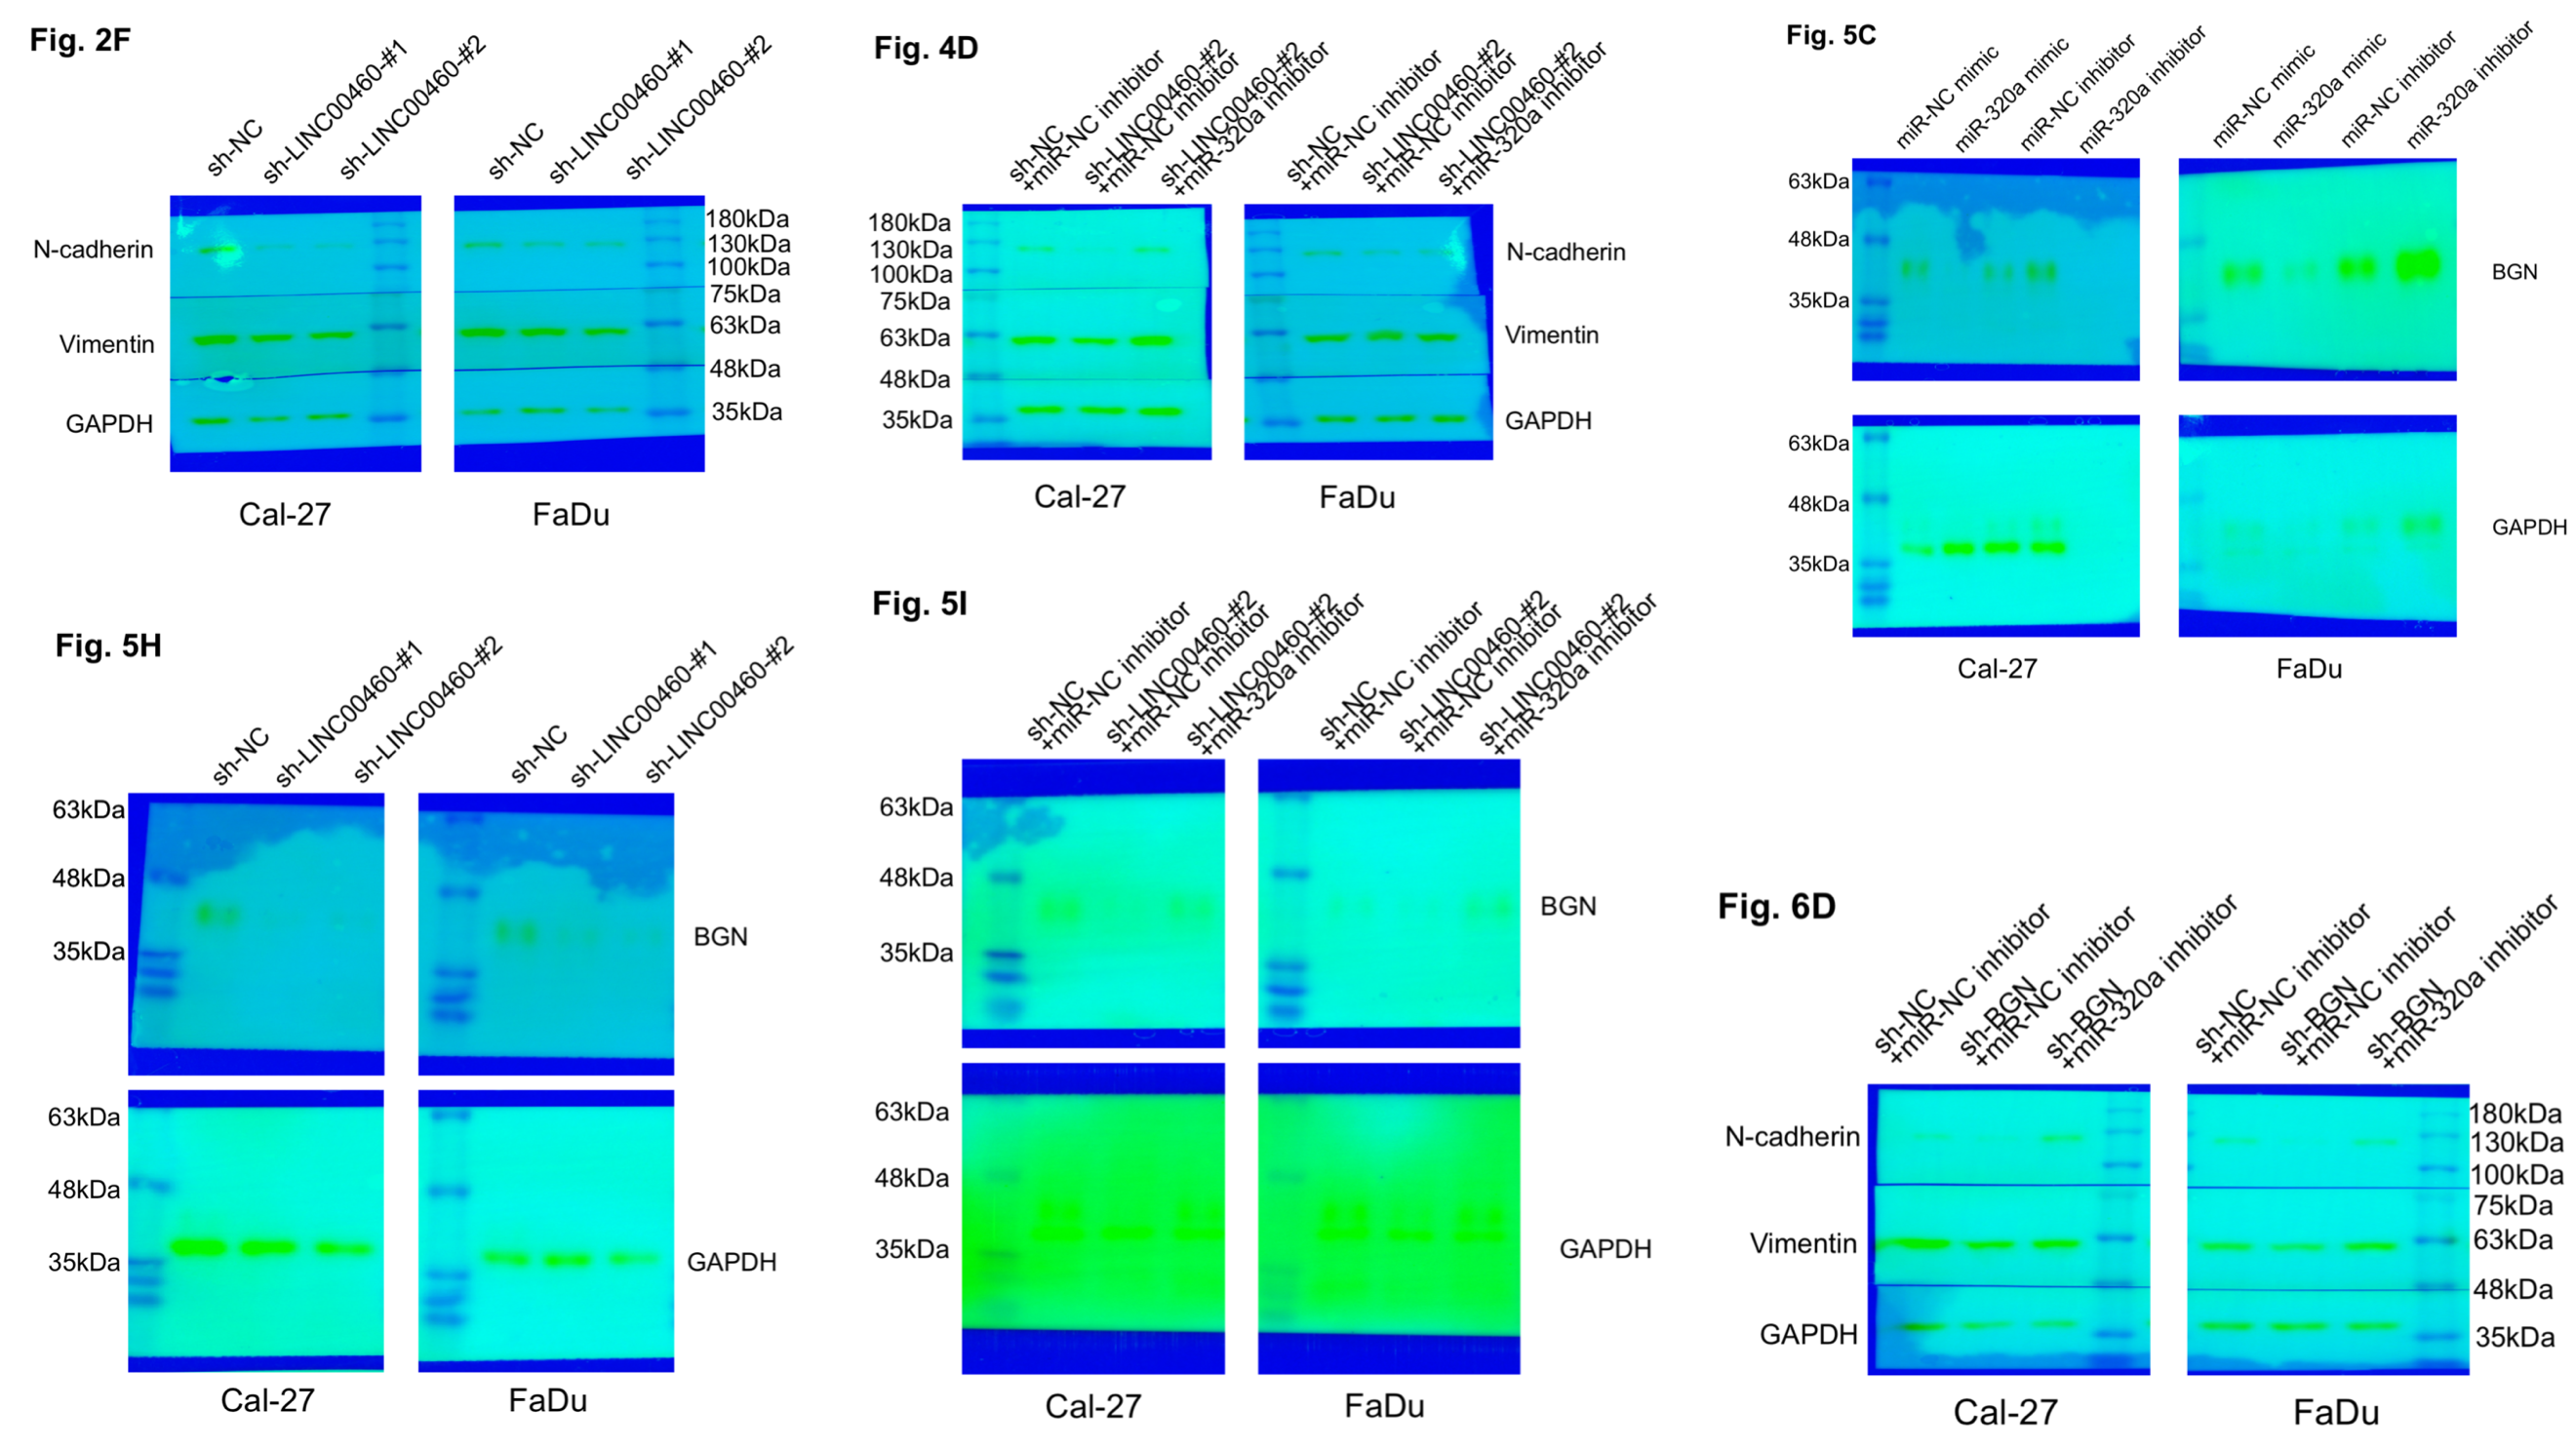

Supplement: Supplementary file 1 [file get_supplementary_file.php]
